# Supplementary material for: Connective tissue growth factor as a novel therapeutic target in high grade serous ovarian cancer
Source: PubMed Central journal article supplement (PMC4792575; doi:10.18632/oncotarget.6082), 2015-11-11
Supplement: oncotarget-06-44551-s001.pdf [file oncotarget-06-44551-s001.pdf]

SUPPLEMENTARY FIGURES AND TABLES

A.

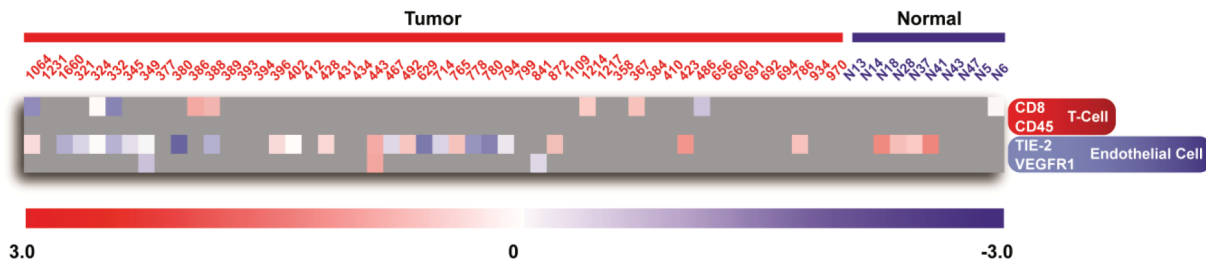

B.

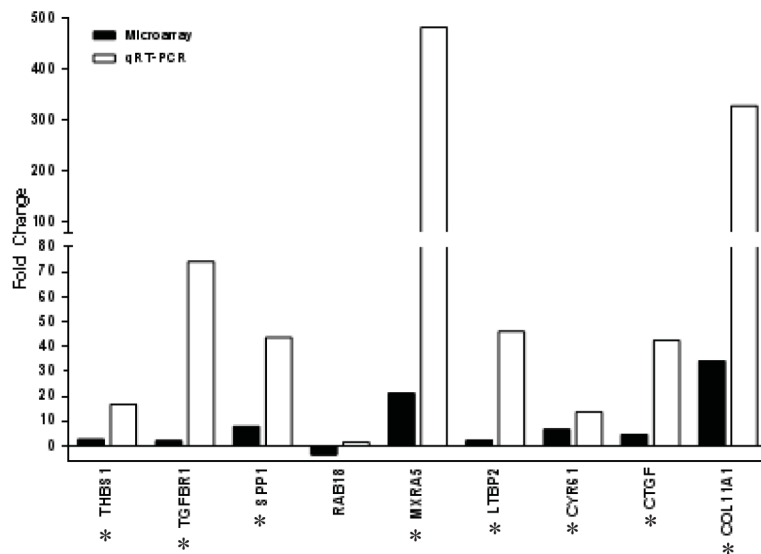

**Supplementary Figure S1: A.** Gene expression levels of markers of endothelial cells (TIE-2 and VEGFR1) and T-cells (CD8 and CD45) in normal ovarian and HGSOc-associated fibroblasts analyzed in this study. **B.** Validation of microarray gene expression differences by quantitative real-time PCR. qRT-PCR data were calculated using the  $2^{-\Delta\Delta CT}$  method. Fold-change depicts HGSOc-associated/normal ovarian fibroblast expression. \*p-value <  $10^{-2}$ .

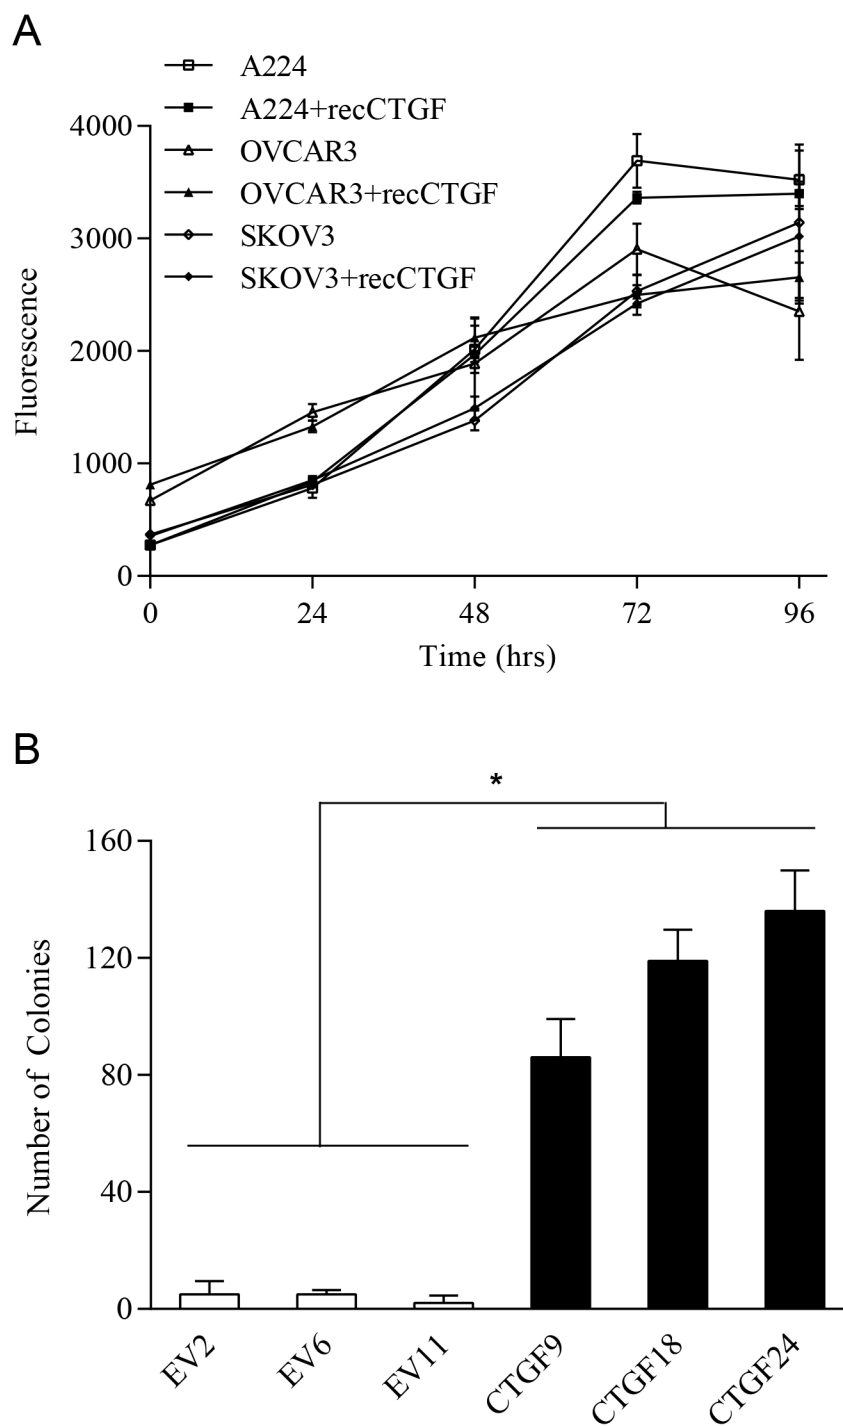

**Supplementary Figure S2: A.** Cell proliferation of A224, OVCAR3 and SKOV3 cells over 4 days with and without addition of 5  $\mu\text{g/ml}$  recombinant CTGF. Each point represents the mean of quadruplicate wells  $\pm$  SD. **B.** Anchorage-independent growth by soft agar colony formation, using OVCAR3 clones stably transfected with either empty vector (EV), or a CTGF-expressing vector (CTGF). Each bar represents the mean of triplicate wells  $\pm$  SD. \* $p < 0.0001$ .

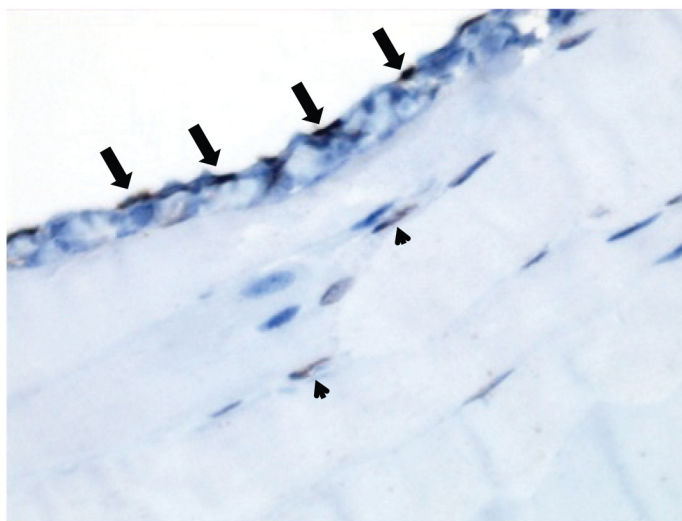

**Supplementary Figure S3:** CTGF is expressed in mesothelial cells (block arrows) and fibroblasts (arrowheads) in peritoneal tissue of Balb/c mice.

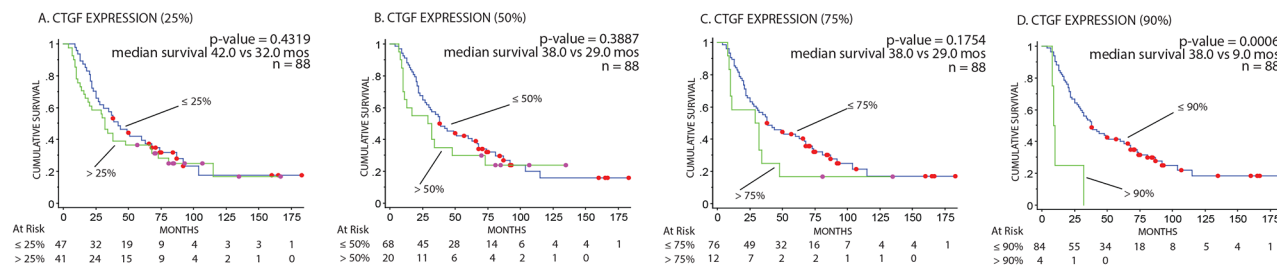

**Supplementary Figure S4:** Kaplan-Meier overall survival curves in HGSOC TMA cases with 25% **A.** 50% **B.** 75% **C.** or 90% **D.** of stromal cells expressing CTGF protein. P-values and differences in median survival are indicated for each survival comparison.

CTGF Gene Expression in TCGA

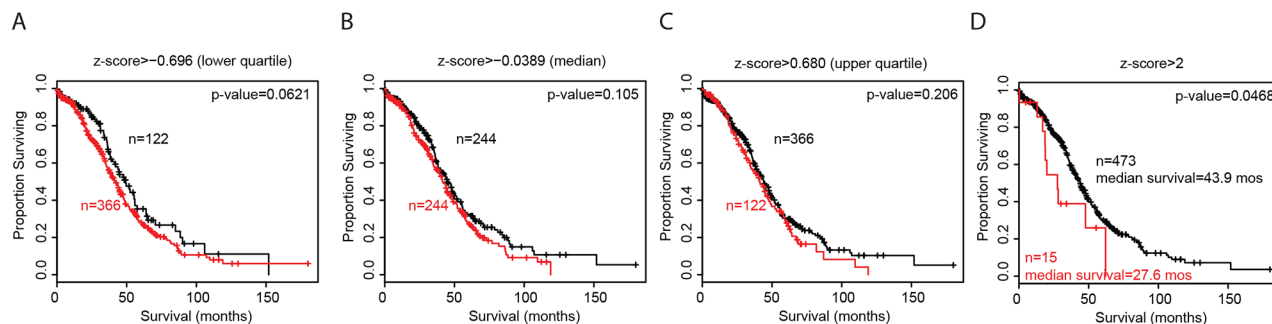

**Supplementary Figure S5:** Kaplan-Meier overall survival curves of the TCGA HGSOC dataset. Survival was compared in cases with CTGF gene expression below and above the lower quartile **A.** median **B.** upper quartile **C.** and in cases with high (z-score > 2) and low (z-score ≤ 2) CTGF gene expression **D.** P-values are indicated for each survival comparison.

**Supplementary Table S1:** Primer Sequences for qRT-PCR validation

| Name          | Sequence                  |
|---------------|---------------------------|
| GUSB-F        | ACTCTTGGTATCACGACTACG     |
| GUSB-R        | CTGCTCCATACTCGCTCTG       |
| Cyclophilin-F | TTCTTCATCACCTATGGCAAAC    |
| Cyclophilin-R | GCAACTTCTCCAACCTCATCTAG   |
| CTGF-F        | TCACTGACCTGCCTGTAG        |
| CTGF-R        | GCTGAGTCTGCTGTTCTG        |
| CYR61-F       | GCTTGTGGAGTTGATGAC        |
| CYR61-R       | TCAGGAAGGGATGGAATG        |
| SPP1-F        | CGTGGGAAGGACAGTTATG       |
| SPP1-R        | GCTCATTGCTCTCATCATTAG     |
| TGFBR1-F      | GGTATTATGTTGCTCAGTTAC     |
| TGFBR1-R      | GGCTTCTCAGTATCATTCTG      |
| THBS1-F       | TTGTTGTGTGACTGAGTAAAG     |
| THBS1-R       | CCTTATTGGGAATACTTCTCTG    |
| MXRA5-F       | GTCACCACTGTTATATTACCTTCTC |
| MXRA5-R       | CTCTCCTCTCACCTCCTCTG      |
| LTBP2-F       | CACCATCGGAGAACTTACC       |
| LTBP2-R       | CTCAAGGTTGGCAGGAAG        |
| RAB18-F       | CAAATAGGCTTGCTGTGTTTC     |
| RAB18-R       | CTCTCTTGTCTTTCTACCATCC    |
| COL11A1-F     | AAGTTGGTGTGGCTAAGATG      |
| COL11A1-R     | CCTGGATGGATGAGAATGAG      |

**Supplementary Table S2:** List of 2,703 probe sets identified as significantly differentially expressed between HGSOC-associated fibroblasts and normal ovarian fibroblasts, using a multivariate permutation test providing 95% confidence that there were no more than 10 false discoveries (*p-value* < 0.001).

**Supplementary Table S3:** List of 48 probe sets commonly identified as differentially expressed in HGSOC stroma.
